# Supplementary material for: Quantitative determination of polyphosphate in sediments using Attenuated Total Reflectance-Fourier Transform Infrared (ATR-FTIR) spectroscopy and partial least squares regression
Source: Royal Society of Chemistry journal article supplement (doi:10.1039/c2an35289c), 2012-01-01
Supplement: c2an35289c.pdf [file c2an35289c.pdf]

## Supporting Information

### Quantitative Determination of Polyphosphate in Sediment using Attenuated Total Reflectance Fourier Transform Infrared (ATR-FTIR) Spectroscopy and Partial Least Squares

Aazam Khoshmanesh, Perran Cook and Bayden R. Wood\*

Water Studies Centre, School of Chemistry, Monash University, Melbourne, Victoria 3168, Australia

\*Corresponding author, Mailing address: Centre for Biospectroscopy, School of Chemistry, Monash University, Melbourne, Victoria 3168, Australia. Phone: 99055721, E-mail: bayden.wood@monash.edu

**Table 1S.** Summary of PLS regression results performed on sediment and sediment extracts

| Concentration range (mg/g) | Spectra data detail                                                                                           | Range of selected Factors | Range of R-squared | Range of RMSEP*  |
|----------------------------|---------------------------------------------------------------------------------------------------------------|---------------------------|--------------------|------------------|
| 0-5                        | River sediment, 1200-1400 $\text{Cm}^{-1}$ , 1 <sup>st</sup> derivative, Reduced Average                      | 7-1                       | 0.986-0.150        | 0.22-1.7 (6)**   |
| 0-2                        | River sediment, 1200-1400 $\text{Cm}^{-1}$ , 1 <sup>st</sup> derivative, Reduced Average                      | 7-1                       | 0.898-0.220        | 0.21-0.2 (2.5)   |
|                            | outliers removed                                                                                              | 6-2                       | 0.961-0.410        | 0.136-0.5 (1.4)  |
| 0-1                        | River sediment, 1200-1400 $\text{Cm}^{-1}$ Max-Normalized, baseline corrected                                 | 7-1                       | 0.999-0.984        | 0.01-0.04        |
| 0-1                        | River sediment, 1200-1400 $\text{Cm}^{-1}$ , 1 <sup>st</sup> derivative, outliers removed                     | 3-1                       | 0.95-0.695         | 0.014-0.03 (0.2) |
| 0-0.5                      | River sediment, 1200-1400 $\text{Cm}^{-1}$ , 1 <sup>st</sup> derivative, Reduced Average, outliers removed    | 4-1                       | 0.92-0.61          | 0.048-0.1 (0.5)  |
| 0-100                      | Wetland sediment, Reduced Average, all range<br>“, outliers removed                                           | 4-2                       | 0.965-0.86         | 13.8 -27.9 (250) |
| 0-50                       | Wetland sediment extract, no outliers removed, 1200-1400 $\text{Cm}^{-1}$ range                               | 4-1                       | 0.989-0.270        | 1.85 (55)        |
| 0-50                       | Wetland sediment extract<br>1 <sup>st</sup> derivative, Outliers removed,<br>1200-1400 $\text{Cm}^{-1}$ range | 6-1                       | 0.985-0.941        | 8.76-18.4 (250)  |
| 0-20                       | 1 <sup>st</sup> derivative, 1200-1400 $\text{Cm}^{-1}$ range                                                  | 5-1                       | 0.99-0.731         | 0.37-4.32 (26)   |
| 0-10                       | 1 <sup>st</sup> derivative, 1200-1400 $\text{Cm}^{-1}$ range                                                  | 7-1                       | 0.99-0.942         | 7.7-18.4 (250)   |

\* Root Mean Square Error of Prediction; \*\*out of full scale predicted versus Reference plots
